# A stochastic mathematical model of 4D tumour spheroids with real-time fluorescent cell cycle labelling

Jonah J. Klowss<sup>a</sup>, Alexander P. Browning<sup>a</sup>, Ryan J. Murphy<sup>a</sup>, Elliot J. Carr<sup>a</sup>, Michael J. Plank<sup>b,c</sup>, Gency Gunasingh<sup>d</sup>, Nikolas K. Haass<sup>†,d</sup>, Matthew J. Simpson<sup>†,a,\*</sup>

<sup>a</sup>*School of Mathematical Sciences, Queensland University of Technology (QUT), Brisbane, Australia.*

<sup>b</sup>*School of Mathematics and Statistics, University of Canterbury, New Zealand.*

<sup>c</sup>*Te Pūnaha Matatini, New Zealand Centre of Research Excellence in Complex Systems and Data Analytics, New Zealand.*

<sup>d</sup>*The University of Queensland Diamantina Institute, Translational Research Institute, The University of Queensland, Brisbane, Australia.*

---

## Abstract

*In vitro* tumour spheroid experiments have been used to study avascular tumour growth and drug design for the last 50 years. Unlike simpler two-dimensional cell cultures, tumour spheroids exhibit heterogeneity within the growing population of cells that is thought to be related to spatial and temporal differences in nutrient availability. The recent development of real-time fluorescent cell cycle imaging allows us to identify the position and cell cycle status of individual cells within the growing population, giving rise to the notion of a four-dimensional (4D) tumour spheroid. In this work we develop the first stochastic individual-based model (IBM) of a 4D tumour spheroid and show that IBM simulation data qualitatively and quantitatively compare very well with experimental data from a suite of 4D tumour spheroid experiments performed with a primary human melanoma cell line. The IBM provides quantitative information about nutrient availability within the spheroid, which is important because it is very difficult to measure these data in standard tumour spheroid experiments. Software required to implement the IBM is available on GitHub, <https://github.com/ProfMJSimpson/4DFUCCI>.

*Keywords:* Cancer; Melanoma; Individual-based model; FUCCI; Population dynamics.

---

\*Corresponding author at: [matthew.simpson@qut.edu.au](mailto:matthew.simpson@qut.edu.au)

<sup>†</sup>These authors contributed equally to this work.

## 1. Introduction

*In vitro* tumour spheroid experiments are widely-adopted to study avascular tumour growth and anti-cancer drug design [1–3]. Unlike simpler two-dimensional assays, tumour spheroid experiments exhibit heterogeneity within the growing population of cells, and this heterogeneity is thought to be partly driven by spatial and temporal differences in the availability of diffusible nutrients, such as oxygen [3, 4]. Historically, tumour spheroids have been analysed experimentally using bright field imaging to measure the size of the growing spheroid [5, 6], however this approach does not reveal information about the internal structure of the growing population. Since 2008, *fluorescent ubiquitination-based cell cycle indicator* (FUCCI) has enabled real-time identification of the cell cycle for individual cells within growing populations [4, 7, 8]. Using FUCCI, nuclei of cells in G1 phase fluoresce red, nuclei of cells in S/G2/M phase fluoresce green, and nuclei of cells in early S (eS) phase appear yellow as a result of both red and green fluorescence being active [7] (Figure 1a). FUCCI simultaneously provides information about spheroid size and heterogeneity of the cell cycle status (Figure 1c-e). In particular, at early times the entire spheroid is composed of freely cycling cells, with a relatively even distribution of FUCCI colours, whereas at intermediate times cells in the central region become predominantly red, indicating G1-arrest [4]. Late time growth is characterised by the formation of a central necrotic region, indicated by a complete absence of fluorescence. FUCCI allows us to identify both the position of individual cells within the growing spheroid in three spatial dimensions, as well as identifying cell cycle status, giving rise to the notion of a *four-dimensional (4D) tumour spheroid* [9]. Assuming spherical symmetry, we can characterise the geometry of 4D spheroids by three radii:  $r_o(t) > 0$  is the outer radius,  $r_a(t) \geq 0$  is the arrested radius, and  $r_n(t) \geq 0$  is the necrotic radius, with  $r_o(t) > r_a(t) \geq r_n(t)$ . In Figure 1e, we see that  $r_n(t) = 0$  for  $t \leq 3$ , with the necrotic core forming sometime between  $t = 3$  and  $t = 6$  days.

Continuum mathematical models of tumour spheroids have been developed, analysed, and deployed for over 50 years [10–18], and these developments have included very recent adaptations of classical models so that they can be used to study tumour spheroids with FUCCI [9]. However, continuum modelling approaches lack the ability to track individual cells within the growing population, and typically neglect heterogeneity and stochasticity within the population. In comparison,

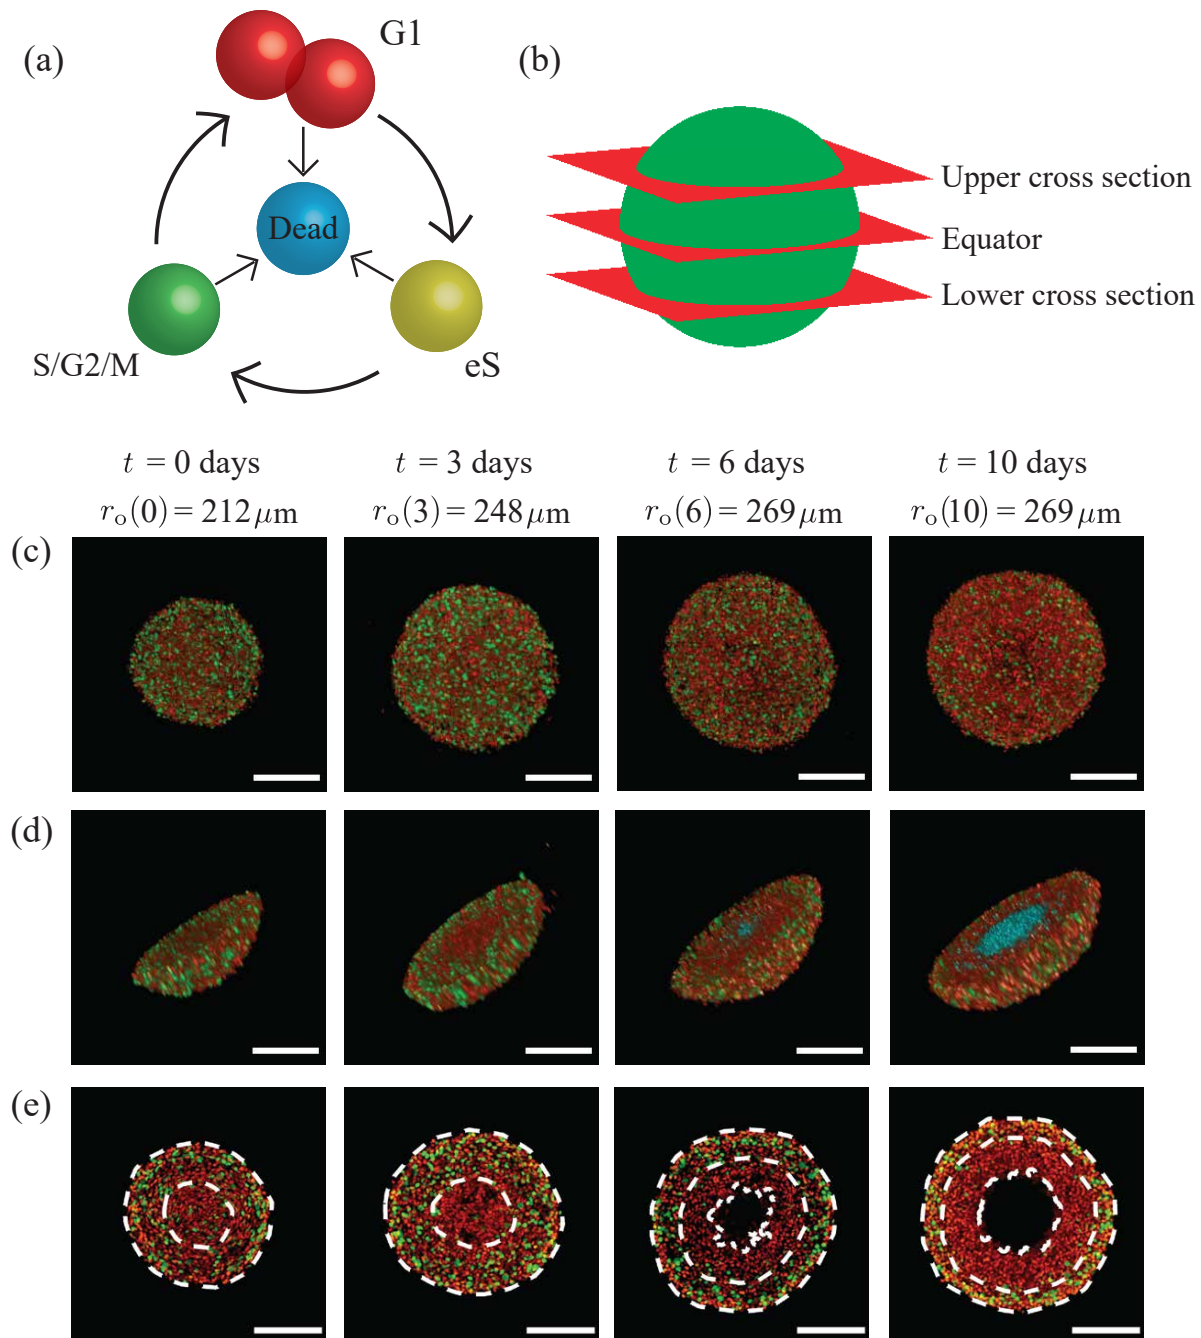

**Figure 1:** Motivation. (a) A schematic of the cell cycle, indicating the transition between different cell cycle phases, and their associated FUCCI fluorescence. Red, yellow, and green colouring indicates cells in G1, eS, and S/G2/M phase, respectively. (b) Locations of the upper cross section, equator and lower cross section. (c)–(e) Experimental images of a tumour spheroid using the human melanoma cell line WM793B at days 0, 3, 6, and 10 (after formation) showing: (c) full spheroids, viewed from above; (d) spheroid hemispheres; and, (e) spheroid slices, where the cross section is taken at the equator. White dashed lines in (e) denote the boundaries of different regions, where the outermost region is the proliferative zone, the next region inward is the G1-arrested region, and the innermost region at days 6 and 10 is the necrotic core. In (a) and (d) we use cyan colouring for dead cells, which assist in identifying the necrotic core in (d). Spheroid outer radii are labelled alongside their corresponding time points, and scale bars represent  $200\ \mu\text{m}$ .

individual-based models (IBMs) allow us to study population dynamics in detail by keeping track of all individuals within the population, as well as explicitly including effects of heterogeneity and stochasticity [19–23]. While some previous IBMs have been developed to describe classical tumour spheroid experiments without FUCCI [24, 25], no IBMs have been developed with the specific goal of simulating 4D tumour spheroid experiments with FUCCI.

In this work, we develop a continuous-space, continuous-time IBM of 4D tumour spheroid growth with FUCCI. The IBM explicitly describes how individual cells migrate, die, and progress through the cell cycle to mimic FUCCI. Certain mechanisms in the IBM are coupled to the local availability of a diffusible nutrient. We demonstrate the biological fidelity of the IBM by qualitatively comparing simulation results with detailed experimental images at several cross sections (Figure 1b), with the aim of providing more comprehensive detail about the internal structure. Quantitative data from the model are then used to assess the spheroid population distribution, nutrient concentration, and the role variability plays in the spheroid. We extract and quantitatively compare simulation radius estimates with measurements from a series of 4D tumour spheroid experiments using a human primary melanoma cell line (Figure 1). Using a careful choice of parameter values, we also show that the IBM quantitatively replicates key features of 4D tumour spheroids.

## 2. Methods

### 2.1. Experimental methods

*Spheroid growth and staining:* Human melanoma cells from the WM793B cell line were genotypically characterised [26–28], grown as described in [3], and authenticated by short tandem repeat fingerprinting (QIMR Berghofer Medical Research Institute, Herston, Australia). The WM793B cells were transduced with FUCCI constructs [4]. Spheroid seeding, growth, and staining were performed as described in [3], with 1% penicillin-streptomycin (ThermoFisher, Massachusetts, USA). Three 96-well plates of spheroids, seeded with a density of 10,000 cells per well, were grown and harvested over 14 days. One 96-well plate was placed in an IncuCyte S3 (Sartorius, Göttingen, Germany) and imaged at 6 hour intervals over 14 days. Harvested spheroids were stained with either DRAQ7 (ThermoFisher, Massachusetts, USA) for necrosis or pimonidazole for hypoxia, fixed in 4% paraformaldehyde solution, and stained with DAPI as per [29].

57 To reveal the hypoxic region, spheroids stained with pimonidazole were permeabilised with 0.5%  
58 triton X-100 in phosphate buffered solution (PBS) for one hour, then blocked in antibody dilution  
59 buffer (Abdil) [30] for 24 hours. Spheroids were stained with a 1:50 anti-pimonidazole mouse IgG1  
60 monoclonal antibody (Hypoxyprobe-1 MAb1) in Abdil for 48 hours, before washing in PBS with  
61 0.1% tween-20 for six hours. These spheroids were then placed in a 1:100 solution of Alexa Fluor  
62 647 in Abdil for 48 hours. Following this, the spheroids were washed for six hours in PBS.

63 *Confocal imaging:* Harvested spheroids were mounted in 2% low melting agarose in PBS solution  
64 and cleared in clearing reagent 2 with matching refractive index [29], on #1.5 glass bottom plates.  
65 For collecting 2D cross sections, images were taken at the equator and upper and lower cross sections  
66 (Figure 1b), which we define as the Z coordinate halfway between the equator and the top or bottom  
67 of the spheroid. If the necrotic core exists, the upper and lower cross sections are at the top or  
68 bottom of the necrotic core, respectively. 3D spheroid images were collected by imaging over the  
69 entire Z range of the spheroid.

70 *Computational image analysis:* The image processing algorithm [31] was used to estimate  $r_o(t)$ ,  
71  $r_a(t)$ , and  $r_n(t)$ .

## 72 2.2. Individual-based mathematical model

73 We simulate 4D spheroid growth inside a cubic domain,  $\Omega$ , of side length  $L$ , where  $L$  is chosen to  
74 be large enough so that agents do not reach the boundary of the domain during the simulation, but  
75 not so large as to incur significant computational overhead (Supplementary S3.3). Biological cells are  
76 represented as discrete agents located at  $\mathbf{x}_n(t) = (x_n(t), y_n(t), z_n(t))$  for  $n = 1, 2, 3, \dots, N(t)$ , where  
77  $N(t)$  is the total number of agents at time  $t$ .

### 78 Gillespie algorithm

79 The IBM describes key cellular-level behaviours; namely cell cycle progression and mitosis, cell  
80 motility, and cell death, as discrete events simulated using the Gillespie algorithm [32]. Each agent  
81 has an allocated rate of cell cycle progression, dependent on its cell cycle status and the local nutrient  
82 concentration (Figure 2a). Agents in each phase of the cell cycle are coloured according to FUCCI,  
83 with G1 agents coloured red, eS agents coloured yellow, and S/G2/M agents coloured green.

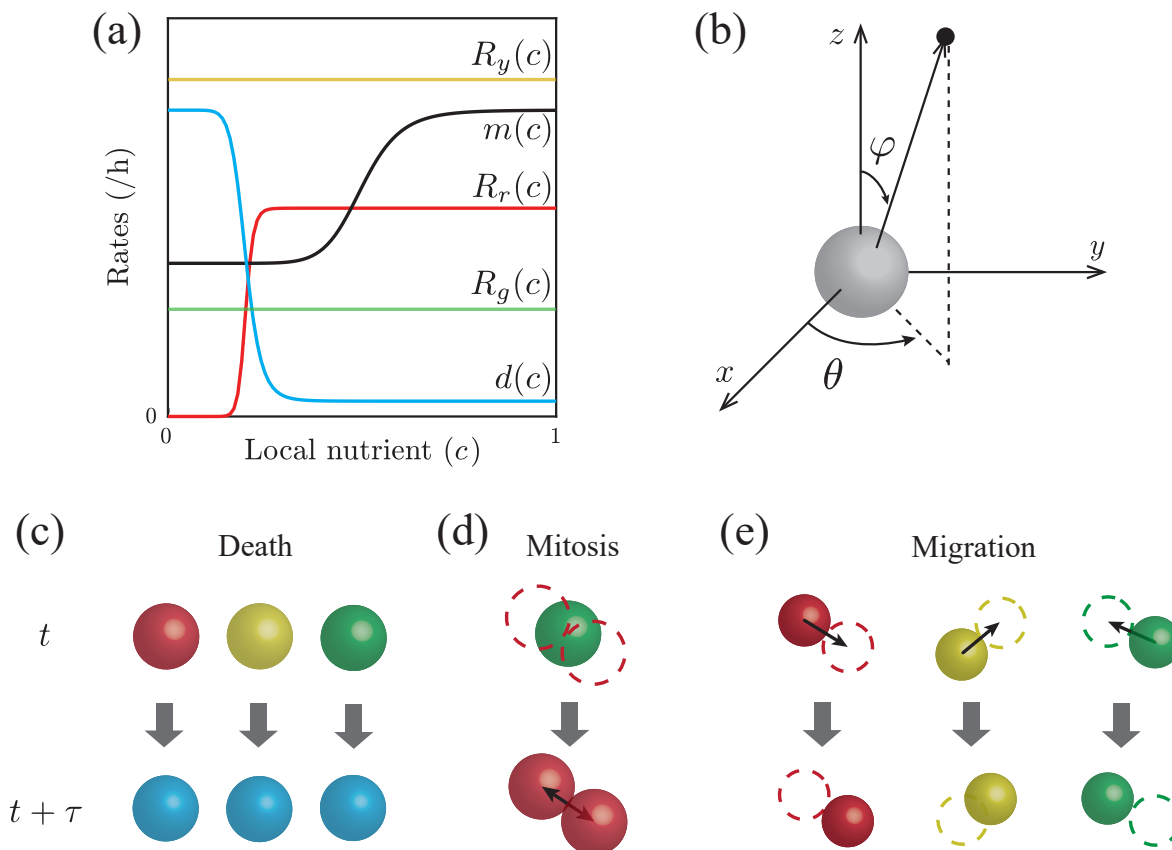

**Figure 2:** IBM schematic. (a) Nutrient-dependent rates (Equations (1)–(5)). (b) Random directions for migration and mitosis are obtained by sampling the polar angle  $\theta$ , and the azimuthal angle  $\varphi$  separately [33]. (c)–(e) Schematics showing agent-level events; death, mitosis, and migration, across a time interval of duration  $\tau$ . (c) Any living agent may die, removing it from the simulation. (d) An agent located at  $\mathbf{x}_n$  undergoes mitosis to produce two daughter agents in G1 phase and dispersed a distance of  $\sigma/2$  from  $\mathbf{x}_n$  in opposite, randomly chosen directions. (e) Any living agent can migrate in a random direction with step length  $\mu$ .

84 We make the natural assumption that biological cells require access to sufficient nutrients to  
 85 commit to entering the cell cycle. Therefore, the red-to-yellow transition rate,  $R_r(c)$ , depends on the  
 86 local nutrient concentration,  $c(\mathbf{x}, t)$  (Figure 2a). Once an agent has committed to entering the cell  
 87 cycle, we assume the yellow-to-green transition takes place at a constant rate  $R_y$ , and the green-to-red  
 88 transition, which involves mitosis, occurs at a constant rate  $R_g$  (Figure 2a).

89 The rate of agent death is assumed to depend on the local nutrient concentration,  $d(c)$ . When  
 90 an agent dies, it is removed from the simulation and we record the location at which the death event  
 91 occurs (Figure 2c). When an agent moves or undergoes mitosis (Figure 2d-e), a random direction  
 92 in which the agent will migrate, or its daughter agents will disperse, is chosen (Figure 2b). For  
 93 an agent undergoing mitosis, the first daughter agent is placed a distance  $\sigma/2$  along the randomly

94 chosen direction, and the second daughter agent is placed at a distance  $\sigma/2$  in the opposite direction,  
 95 leaving the two daughter agents dispersed a distance of  $\sigma$  apart, where we set  $\sigma$  to be equal to a  
 96 typical cell diameter [34] (Figure 2d, Table 1). When migrating, agents are displaced a distance  $\mu$   
 97 along the randomly chosen direction (Figure 2e). Similar to the dispersal, we simulate migration by  
 98 taking the step length  $\mu$  to be a typical cell diameter.

99 We specify the agent cycle progression rates,

$$R_r(c) = R_r \frac{c^{\eta_1}}{c_a^{\eta_1} + c^{\eta_1}}, \quad (1)$$

$$R_y(c) = R_y, \quad (2)$$

$$R_g(c) = R_g, \quad (3)$$

$$m(c) = (m_{\max} - m_{\min}) \frac{c^{\eta_2}}{c_m^{\eta_2} + c^{\eta_2}} + m_{\min}, \quad (4)$$

$$d(c) = (d_{\max} - d_{\min}) \left( 1 - \frac{c^{\eta_3}}{c_d^{\eta_3} + c^{\eta_3}} \right) + d_{\min}, \quad (5)$$

100 where  $c(\mathbf{x}_n, t) \in [0, 1]$  is the non-dimensional nutrient concentration at the location of the  $n$ th agent;  
 101  $R_r > 0$  is the the maximum red-to-yellow transition rate;  $m_{\max} > m_{\min} \geq 0$  are the maximum and  
 102 minimum migration rates, respectively;  $d_{\max} > d_{\min} \geq 0$  are the maximum and minimum death rates,  
 103 respectively;  $\eta_1 > 0$ ,  $\eta_2 > 0$ , and  $\eta_3 > 0$  are Hill function indices; and  $c_a > 0$ ,  $c_m > 0$ , and  $c_d > 0$  are  
 104 the inflection points of  $R_r(c)$ ,  $m(c)$ , and  $d(c)$  respectively (Figure 2a).

### 105 *Nutrient dynamics*

106 We make the simplifying assumption that cell migration, death, and progression through the  
 107 cell cycle are regulated by a single diffusible nutrient, such as oxygen [4, 10, 12]. The spatial and  
 108 temporal distribution of nutrient concentration,  $C(\mathbf{x}, t)$ , is assumed to be governed by a reaction-  
 109 diffusion equation

$$\frac{\partial C}{\partial t} = D \nabla^2 C - \kappa C v, \quad \text{in } \Omega, \quad (6)$$

110 with diffusivity  $D > 0$  [ $\mu\text{m}^2/\text{h}$ ], and consumption rate  $\kappa > 0$  [ $\mu\text{m}^3/(\text{h cells})$ ], and where  $v(\mathbf{x}, t) \geq$   
 111  $0$  [ $\text{cells}/\mu\text{m}^3$ ] is the density of agents at position  $\mathbf{x}$  and time  $t$ . The source term in Equation (6)  
 112 describes the consumption of nutrient at a rate of  $\kappa$  [ $\mu\text{m}^3/(\text{h cells})$ ]. To solve this reaction-diffusion



113 equation we set  $v(\mathbf{x}_{i,j,k}, t) = N_{i,j,k}/h^3$ , where  $N_{i,j,k}$  is the number of agents within the control volume  
114 surrounding the node located at  $(x_i, y_j, z_k)$  and  $h^3$  is the volume of the control volume. On the  
115 boundary,  $\partial\Omega$ , we impose  $C = C_b$ , where  $C_b$  is some maximum far-field concentration.

116 Our experiments lead to spheroids of diameter 500–600  $\mu\text{m}$  over a period of 10 days after spheroid  
117 formation (Figure 1) (14 days after seeding). Since these length and time scales are clear, we leave  
118 the independent variables  $\mathbf{x}$  and  $t$  in Equation (6) as dimensional quantities. In contrast, spatial  
119 and temporal variations of  $C(\mathbf{x}, t)$  are very difficult to measure during spheroid growth, so we non-  
120 dimensionalise the independent variable  $c(\mathbf{x}, t) = C(\mathbf{x}, t)/C_b$ , giving

$$\frac{\partial c}{\partial t} = D\nabla^2 c - \kappa cv, \quad \text{in } \Omega. \quad (7)$$

121 with  $c = 1$  on  $\partial\Omega$ , and  $c(\mathbf{x}, t) \in [0, 1]$ .

122 Typically, the time scale of nutrient diffusion is much faster than the time scale of spheroid growth  
123 [10]. Consequently, we approximate Equation (7) by

$$0 = \nabla^2 c - \alpha cv, \quad \text{in } \Omega, \quad (8)$$

124 where  $\alpha = \kappa/D > 0$  [ $\mu\text{m}/\text{cells}$ ]. Therefore, we describe the spatial and temporal distribution of  
125 nutrients by solving Equation (8) repeatedly during the simulation. This quasi-steady approximation  
126 is computationally convenient, as we describe later. We solve Equation (8) with a finite volume  
127 method on a uniform structured mesh (Supplementary S3).

### 128 2.3. Simulation algorithm

129 We simulate spheroid growth by supposing the spheroid initially contains  $N(0)$  agents distributed  
130 uniformly within a sphere of radius  $r_o(0) > 0$  [ $\mu\text{m}$ ]. While it is experimentally relevant to assume  
131 the population is spherically symmetric at  $t = 0$ , this assumption is not necessary, and we will  
132 discuss this point later. The proportion of agents chosen to be red, yellow, or green at  $t = 0$  can be  
133 selected arbitrarily, but we choose these proportions so that the internal structure and composition  
134 of the *in silico* spheroids are consistent with our *in vitro* measurements. We achieve this by choosing  
135 the initial red, yellow, and green population,  $N_r(0)$ ,  $N_y(0)$ , and  $N_g(0)$ , respectively, noting that



136  $N(0) = N_r(0) + N_y(0) + N_g(0)$  (Supplementary S7). The most appropriate time scale for individual  
137 cell-level behaviour is hours, however spheroid development takes place over 10 days, so we will use a  
138 mixture of time scales to describe different features of the experiments and simulations as appropriate.  
139 We simulate spheroid growth from  $t = 0$  to  $t = T$  h, updating the nutrient concentration at  $M$   
140 equally-spaced points in time. This means that the nutrient concentration is updated at intervals  
141 of duration  $t^* = T/M$  [h]. The accuracy of our algorithm increases by choosing larger  $M$  (smaller  
142  $t^*$ ), but larger  $M$  decreases the computational efficiency. We explore this tradeoff and find that  
143 setting  $t^* = 1$  h is appropriate (Supplementary S3.4). When Equation (8) is solved for  $c(\mathbf{x}, t)$ ,  
144 the value of  $c(\mathbf{x}_n, t)$  at each agent is calculated using linear interpolation. These local nutrient  
145 concentrations are held constant for each agent while resolving all the various agent-level events  
146 (cycling and proliferation, migration, death) from time  $t$  to time  $t+t^*$ . After resolving the appropriate  
147 agent-level events, we update the agent density before updating the nutrient profile again. Pseudo-  
148 algorithms for the IBM are provided (Supplementary S8), and code to reproduce key results is  
149 available on [GitHub](#).

#### 150 2.4. IBM image processing

151 To estimate  $r_o(t)$ ,  $r_a(t)$ , and  $r_n(t)$ , we apply methods described in [18, 31, 35] to the IBM output.  
152 Briefly, we import the agent locations from a particular cross section, and map these locations to an  
153  $(L + 1) \times (L + 1)$  pixel image, increase the size of the agents to 12 pixels in diameter, and use edge  
154 detection to identify and estimate  $r_o(t)$ ,  $r_a(t)$ , and  $r_n(t)$  (Supplementary S1). This procedure adapts  
155 the image processing approach for the experimental images so that it is applicable to the synthetic  
156 results from the IBM.

### 157 3. Results and Discussion

158 We now compare and analyse images and measurements from a range of *in vitro* experiments  
159 and *in silico* simulations. All experiments use the WM793B melanoma cell line, which takes approx-  
160 imately four days to form spheroids after the initial seeding in the experiments [36]. This means  
161 that  $t = 0$  days corresponds to four days after seeding to give the experimental spheroids sufficient  
162 time to form. Snapshots from the IBM correspond to a single realisation, however time-series data

163 from the IBM are reported by simulating 10 realisations of the IBM and then averaging appropriate  
164 measurements across the 10 simulations.

### 165 *3.1. Parameter values*

166 Table 1 summarises the parameter values used in this study. While some parameters are based  
167 on separate, independent two-dimensional experimental measurements (Supplementary S4 – S5) or  
168 measurements directly from the spheroids where possible (Supplementary S6), other parameters are  
169 chosen based on a series of numerical screening tests (Supplementary S3). We will return to discuss  
170 other options for parameter choices later.

**Table 1:** IBM parameter values.

| Parameter Name                               | Symbol     | Value                           | Source                                      |
|----------------------------------------------|------------|---------------------------------|---------------------------------------------|
| <i>Numerical Parameters</i>                  |            |                                 |                                             |
| Initial number of agents                     | $N(0)$     | 30 000                          | Experimental measurement (Supplementary S6) |
| Initial number of red agents                 | $N_r(0)$   | 20,911                          | Assumption (Supplementary S7)               |
| Initial number of yellow agents              | $N_y(0)$   | 995                             | Assumption (Supplementary S7)               |
| Initial number of green agents               | $N_g(0)$   | 8,094                           | Assumption (Supplementary S7)               |
| Domain length                                | $L$        | 4000 $\mu\text{m}$              | Numerical experiments (Supplementary S3.3)  |
| Initial spheroid radius                      | $r_o(0)$   | 245 $\mu\text{m}$               | Experimental measurement                    |
| Dispersal distance                           | $\sigma$   | 12 $\mu\text{m}$                | Assumption (Supplementary S4)               |
| Migration distance                           | $\mu$      | 12 $\mu\text{m}$                | Assumption (Supplementary S4)               |
| Simulation termination time                  | $T$        | 240 h                           | Experimental measurement                    |
| <i>Per Capita Agent Rates</i>                |            |                                 |                                             |
| Maximum G1-eS transition rate                | $R_r$      | 0.047 /h                        | Experimental measurement (Supplementary S5) |
| Constant eS-S/G2/M transition rate           | $R_y$      | 0.50 /h                         | Experimental measurement (Supplementary S5) |
| Constant S/G2/M-G1 transition rate (mitosis) | $R_g$      | 0.062 /h                        | Experimental measurement (Supplementary S5) |
| Maximum death rate                           | $d_{\max}$ | 2 /h                            | Assumption                                  |
| Minimum death rate                           | $d_{\min}$ | 0.0005 /h                       | Assumption                                  |
| Maximum migration rate                       | $m_{\max}$ | 0.12 /h                         | Assumption                                  |
| Minimum migration rate                       | $m_{\min}$ | 0.06 /h                         | Assumption                                  |
| Hill function index for arrest               | $\eta_1$   | 5                               | Assumption                                  |
| Hill function index for migration            | $\eta_2$   | 5                               | Assumption                                  |
| Hill function index for death                | $\eta_3$   | 15                              | Assumption                                  |
| <i>Nutrient Parameters</i>                   |            |                                 |                                             |
| Number of nodes                              | $I^3$      | 201 <sup>3</sup>                | Assumption (Supplementary S3.4)             |
| Steady-state solution interval               | $t^*$      | 1 h                             | Assumption (Supplementary S3.4)             |
| Consumption-diffusion ratio                  | $\alpha$   | 0.15 $\mu\text{m}/\text{cells}$ | Assumption                                  |
| Critical arrest concentration                | $c_a$      | 0.4                             | Assumption                                  |
| Critical migration concentration             | $c_m$      | 0.5                             | Assumption                                  |
| Critical death concentration                 | $c_d$      | 0.1                             | Assumption                                  |

171 3.2. Qualitative comparison of experiments and simulations

172 We now qualitatively compare images of *in vitro* (Figure 3a,c,e) and *in silico* (Figure 3b,d,f)  
173 spheroids by imaging various cross sections at different locations, including the equator (Figure 3a-  
174 b), the lower cross section (Figure 3c-d), and the upper cross section (Figure 3e-f). We use the  
175 definitions in Section 2.1 (Confocal imaging) to identify the lower and upper cross sections in the  
176 analysis of both the experimental images and the simulation images. While previous studies have  
177 often compared model predictions with experimental observations at a single cross section [25, 36],  
178 we aim to provide more comprehensive information about the internal structure of the spheroid by  
179 making comparisons at multiple locations.

180 At the beginning of the experiment, in all cross sections (*in vitro* and *in silico*) we see the  
181 population is relatively uniform, with an even distribution of colours, suggesting the entire spheroid  
182 is composed of freely-cycling cells. At  $t = 2$  and  $t = 4$  days, however, we begin to see the development  
183 of heterogeneity within the growing *in vitro* and *in silico* populations, with those cells and agents at  
184 the centre of the growing spheroid predominantly red, indicating G1-arrest. By  $t = 4$  days we see the  
185 value of comparing different cross sections, since the G1-arrest is clear in the centre of the equatorial  
186 cross section, but there is no obvious heterogeneity present across either the upper or lower cross  
187 section at that time. Similarly, by  $t = 6$  days we see the formation of a necrotic core in the equatorial  
188 cross section, but this is not present at either cross section. By  $t = 8$  and  $t = 10$  days the spheroid  
189 has developed into a relatively complicated heterogeneous structure where the outer spherical shell  
190 contains freely cycling cells, the intermediate spherical shell contains living G1-arrested cells, and  
191 the internal region does not contain any fluorescent cells.

192 Overall, the qualitative match between the IBM and the experiment confirms that the IBM  
193 captures both the macroscopic growth of the entire spheroid, as well as the emergent spatial and  
194 temporal heterogeneity. We now build on this preliminary qualitative information by extracting  
195 quantitative measurements of the spheroid growth and exploring the performance of the IBM.

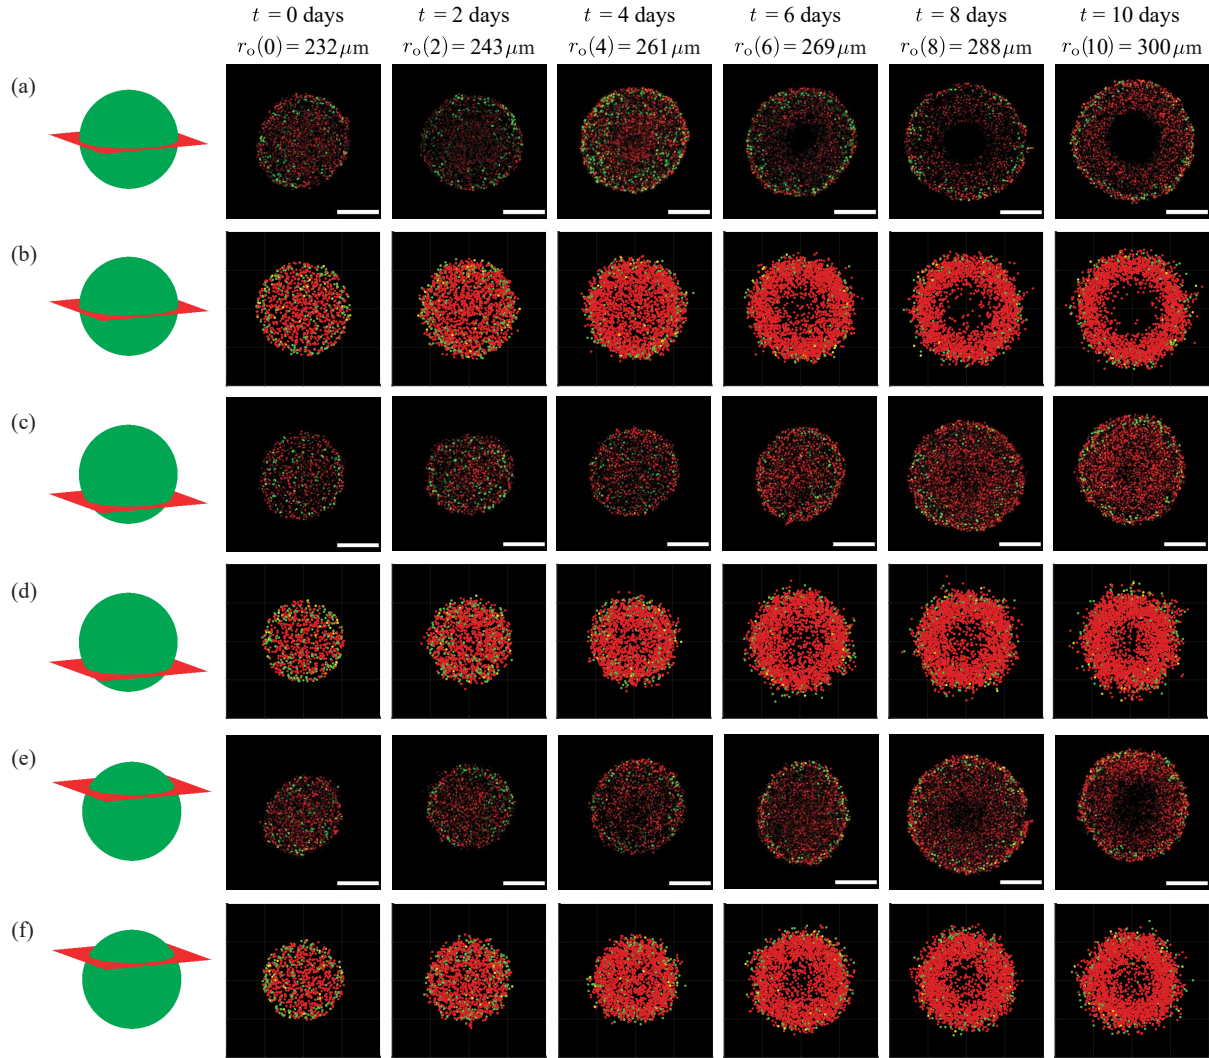

**Figure 3:** Comparison of *in vitro* and *in silico* 4D spheroids. Experimental results (a,c,e) are compared with simulation results (b,d,f) by examining 2D slices at the equator, lower and upper cross section, respectively. Agent colour (red, yellow, green) corresponds to FUCCI labelling (G1, eS, S/G2/M). Schematics in the left-most column indicate the location of the 2D cross section. The images are taken at (a)–(b) the equator, (c)–(d) the lower cross section, and (e)–(f) the upper cross section. Experimental spheroid radii at the equator are labelled at each time point, and scale bars represent 200  $\mu\text{m}$ .

### 196 3.3. Spheroid structure and nutrient profiles

197 Given the ability of the IBM to capture key spatial and temporal patterns of spheroid growth,  
198 cell cycle arrest, and cell death throughout the spheroid, we now demonstrate how to take these  
199 preliminary simulations and extract detailed quantitative data that would be difficult to obtain  
200 experimentally. Figure 4a shows a typical IBM simulation during the interval where we observe the  
201 development of internal structure. For clarity, we plot the locations of all living agents as in Figure 3,  
202 but we now also plot the locations at which agents die, which is difficult to estimate experimentally,  
203 but is straightforward with the IBM. Each spheroid in Figure 4a is shown with an octant removed to  
204 highlight the development of the internal structure, and for further clarity we show equatorial cross  
205 sections in Figure 4b.

206 To quantify the internal spheroid structure we simulate 10 identically prepared realisations of  
207 the IBM and extract averaged quantitative data that are summarised in Figure 4c (Supplemen-  
208 tary S9). These data include plotting the nondimensional nutrient concentration,  $c(\mathbf{x}, t)$ , and var-  
209 ious normalised agent densities,  $\varrho(p(t), t)$ , as a function of distance from the spheroid periphery,  
210  $p(t) = r_o(t) - r$ , where  $r$  is the distance from the spheroid centre. Hence,  $p(t) = 0$  at the spheroid  
211 periphery, and  $p(t) = r_o(t)$  at the spheroid centre. This representation of internal spheroid structure  
212 is made by assuming that the growing population remains spherically symmetric, which is a rea-  
213 sonable assumption since our initial condition and spheroid growth is spherically symmetric (Figure  
214 4a). Each density profile is normalised relative to the maximum value of all agent densities across  
215 all time points, so that we can compare how the density of the various subpopulations of agents and  
216 nutrient are distributed (Supplementary S9). Using the IBM we are able to describe the spatial and  
217 temporal densities of living agents in various phases of the cell cycle (G1, eS and S/G2/M) as well  
218 as G1-arrested agents. We plot each density profile as a function of the distance from the periphery  
219 as this allows us to compare various profiles as the size of the spheroid increases [9, 37].

220 Averaged relative agent density profiles from the IBM provide quantitative information that  
221 cannot be easily obtained from experimental observations. Initially we see the relatively evenly  
222 distributed G1, eS and S/G2/M populations become rapidly dominated by agents in G1 phase,  
223 which then form an obvious inner-most arrested region by about  $t = 2$  days. During the interval

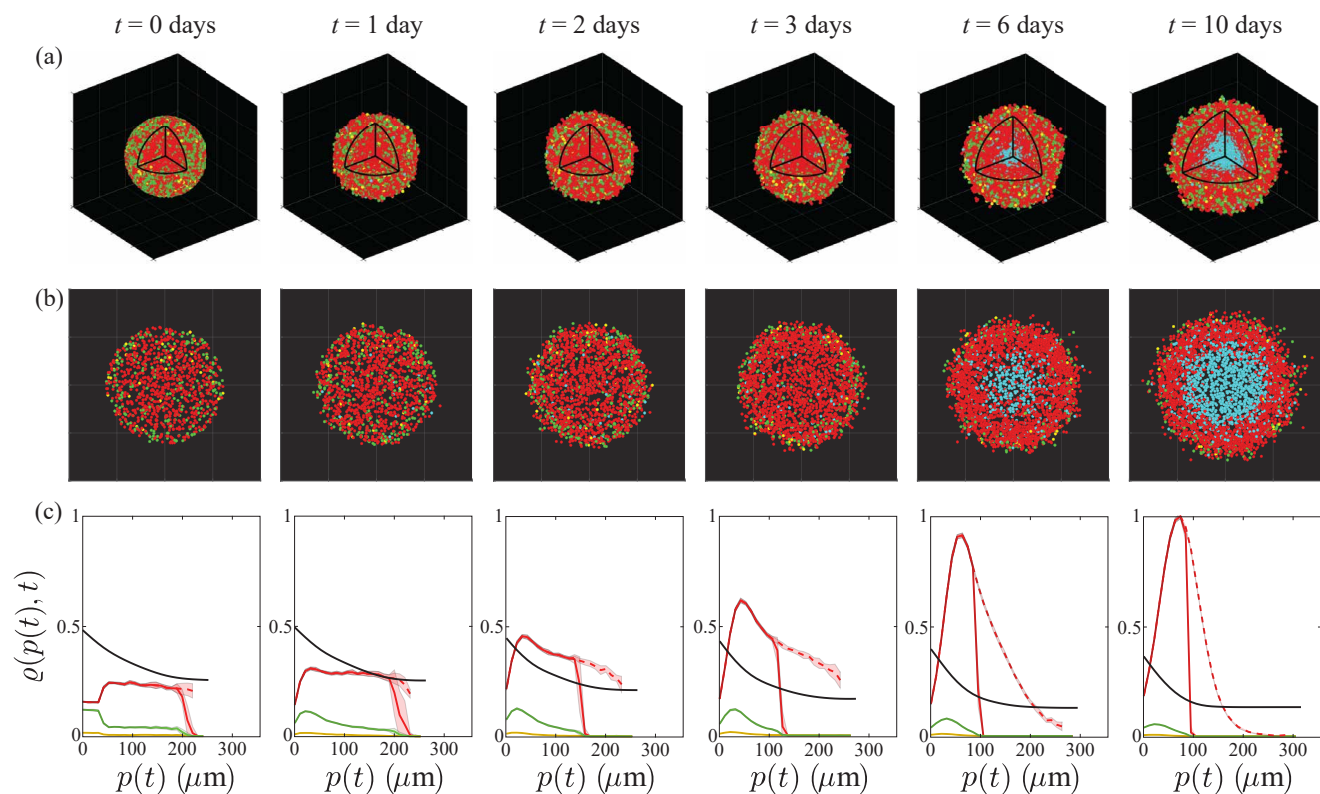

**Figure 4:** Typical IBM simulation, showing: (a) visualisations of *in silico* spheroids including dead agents (cyan) and (b) cross sections through the spheroid equator with dead agents. (c) Relative concentrations  $\varrho(p, t)$  of nutrient (black) and cycling red, yellow, and green agents (coloured appropriately), based on distance from the periphery  $p(t) = r_o(t) - r$ , averaged over 10 identically-prepared simulations. The dashed red line shows the relative density of arrested red agents, also averaged over 10 simulations with identical initial conditions. For nutrient,  $\varrho(p, t) = c$ . For agents,  $\varrho(p, t)$  is the relative agent density (Supplementary S9). Shaded areas represent plus or minus one standard deviation about the mean, and are non-zero as a consequence of stochasticity in the model, even though the 10 simulations start with identical populations and radii.

224  $3 < t < 6$  days we see rapid growth in the arrested population, and the eventual formation of a clear  
 225 necrotic core in the interval  $6 < t < 10$  days. These results indicate the spatial and temporal role  
 226 of stochasticity, with the variability most evident in the G1 and arrested G1 populations at early  
 227 times. Plotting the relative agent densities in this way provides a simple approach to interpret the  
 228 spatial and temporal organisation of cell cycle status within the growing spheroid, and visualising the  
 229 agent densities together with the nondimensional nutrient concentration is particularly useful when  
 230 this kind of information cannot be easily obtained experimentally. In particular, it is technically  
 231 challenging to measure absolute concentrations of nutrient profiles during these experiments [17, 38,  
 232 39] and so we now focus on visualising the nutrient concentration profile that drives this heterogeneity.

233 Results in Figure 5 show spatial and temporal patterns in the nutrient profile,  $c(\mathbf{x}, t)$ , for a  
 234 typical IBM simulation from Figure 4. Figure 5a shows the three-dimensional evolution of  $c(\mathbf{x}, t)$ ,



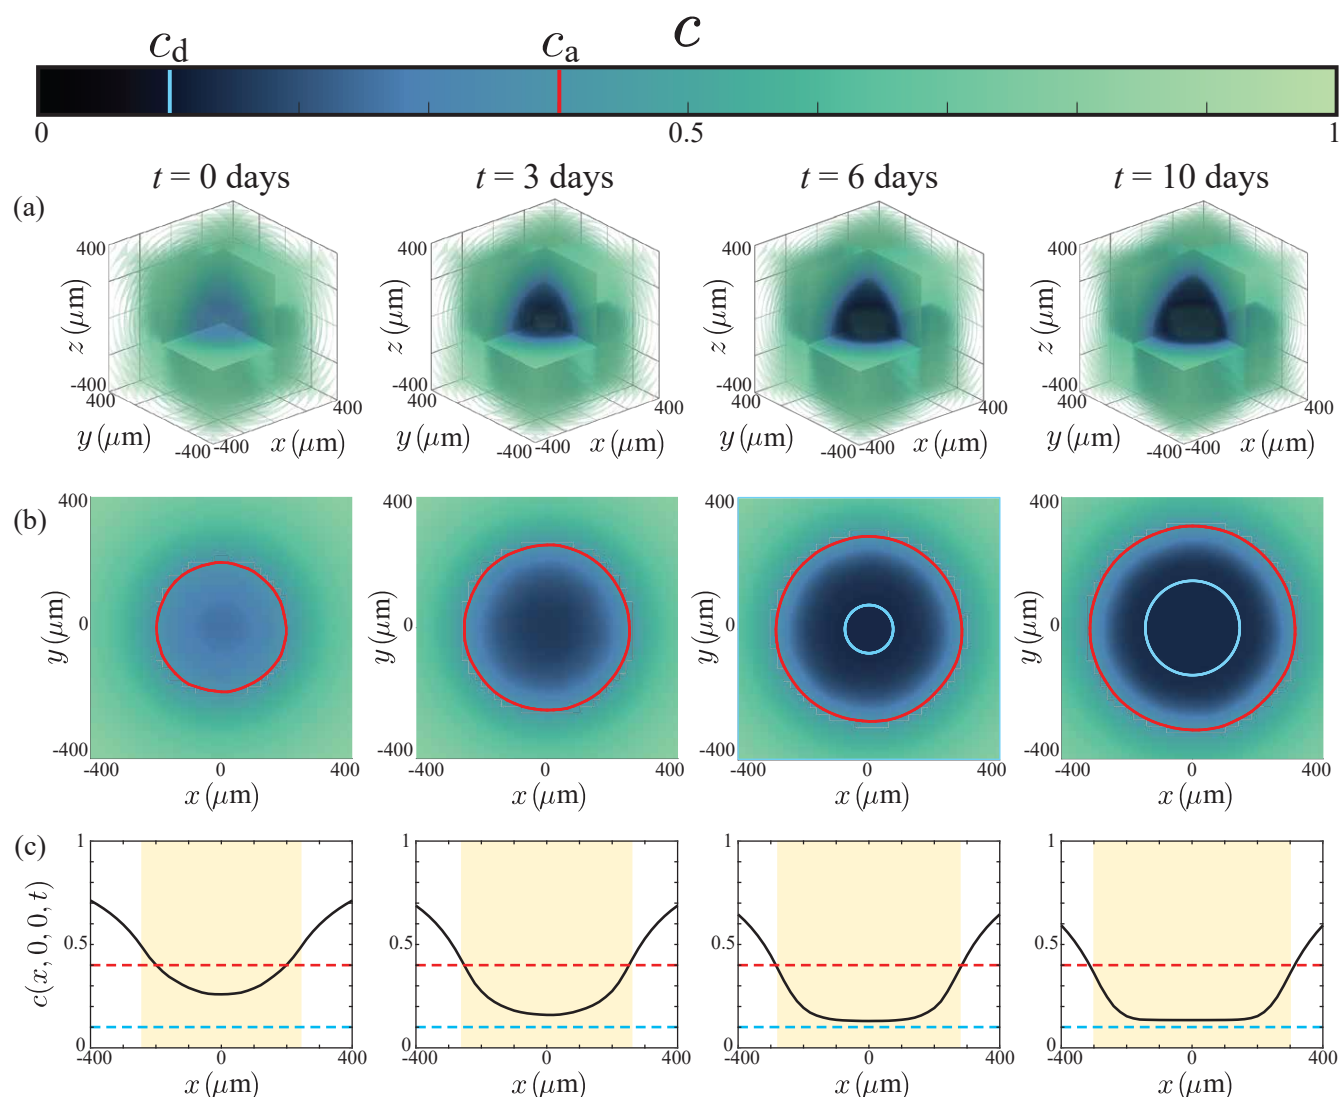

**Figure 5:** Nutrient concentration profiles (a) in three spatial dimensions, (b) at the equator  $z = 0$ , with the arrest critical level  $c_a$  shown in red, and the size of the necrotic region in white. (c) Nutrient profiles along the midline  $y = z = 0$ , where the shaded region represents the size of the spheroid, and the red and cyan lines are the critical levels for arrest and death,  $c_a$  and  $c_d$  respectively. The colourbar corresponds to the profiles in (a)–(b), and denotes the values  $c_a$  (red) and  $c_d$  (cyan).

235 with the colourbar highlighting the death and arrest thresholds,  $c_d$  and  $c_a$ , respectively. These three-  
 236 dimensional plots show the depletion of nutrient over time in the central region of the spheroid, leading  
 237 to strong spatial gradients of nutrient concentration near the edge of the growing spheroid. Profiles in  
 238 Figure 5b show the nutrient profile at the equatorial plane with the  $c(x, y, 0) = c_a$  contour (red) and  
 239 the approximate size of the necrotic core (cyan) superimposed. Simplified one-dimensional profiles  
 240 of  $c(\mathbf{x}, t)$ , along  $\mathbf{x} = (x, 0, 0)$ , are shown in Figure 5c, where the diameter of the growing spheroid  
 241  $(-r_o(t) < x < r_o(t))$  is shaded in yellow. Again, these simplified cross sections illustrate how nutrient

242 consumption leads to the formation of spatial nutrient gradients near the outer radius of the growing  
243 spheroid. Overall, a key strength of the IBM is the ability to extract agent-level information (Figure  
244 4) as well as information about the nutrient distribution (Figure 5), whereas experimental studies  
245 typically report cell-level data without explicitly showing nutrient-level information [4, 6].

246 While it is very difficult to measure the spatial and temporal distribution of diffusible nutrient  
247 experimentally in the growing spheroid, it is possible to indirectly examine our assumption that  
248 spatial and temporal differences in cell cycle status are partly driven by the availability of oxygen.  
249 Figure 6 shows a series of spheroids stained with pimonidazole and pimonidazole-detecting antibodies,  
250 which indicate hypoxia [40]. In this series of images, we see evidence of hypoxia staining in the  
251 central region of the spheroid at  $t = 0$ , with persistent hypoxia staining adjacent to the necrotic  
252 core at later times. These results support our hypothesis that spatial and temporal differences in  
253 nutrient availability correspond with spatial and temporal differences in cell cycle status, and in this  
254 case the pimonidazole staining suggests that oxygen availability plays a role in the development of  
255 heterogeneity within the growing population. While this observation is consistent with our IBM, it  
256 does not rule out the possibility of multiple diffusible signals acting in unison, and we will discuss  
257 this possibility later.

### 258 *3.4. Role of variability*

259 Experimental images (Figure 1, Figure 3, Figure 6) suggest that spheroid development is quite  
260 variable, as we see spheroids of slightly different diameters at the same time points. One of the  
261 limitations of relying on experimentation alone is that it can be difficult to quantify the importance  
262 of different sources of variability, whereas this can be assessed very simply with the IBM. For example,  
263 we can simulate multiple spheroids that start from precisely the same initial condition to quantify  
264 the variability that arises due to the stochastic growth process, or we can deliberately introduce  
265 variability into the initial composition of the spheroid to explore how this variability evolves during  
266 spheroid growth for a suite of simulated spheroids.

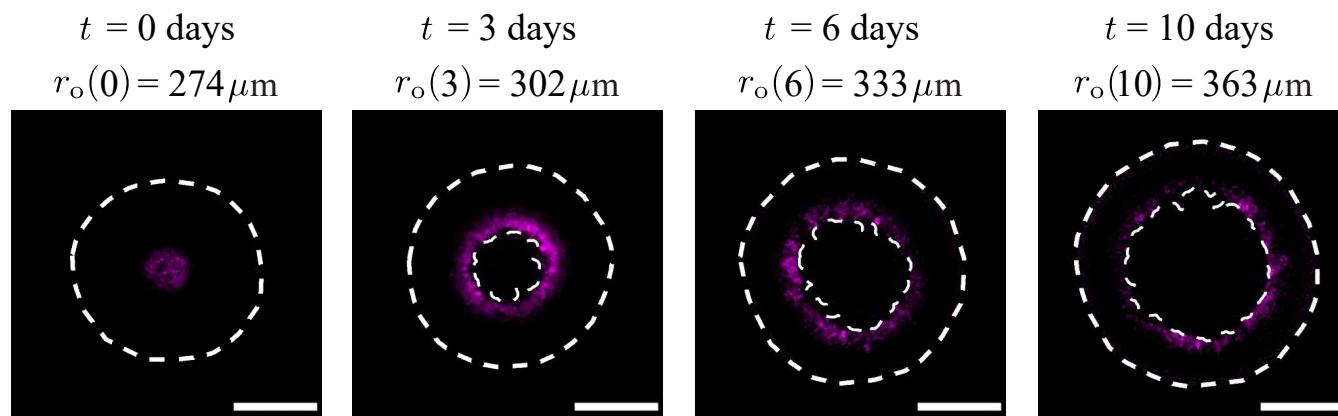

**Figure 6:** Spheroids stained for hypoxia at 0, 3, 6, and 10 days after spheroid formation, imaged at the spheroid equator. Hypoxia-positive staining fluoresces magenta, and white dashed lines denote  $r_o(t)$  and  $r_n(t)$ , detected with image processing, to contextualise the regions of hypoxia. For clear visualisation, we label the outer radii of the spheroid with the corresponding days. Image intensity was adjusted for visual purposes, and scale bar corresponds to  $200 \mu\text{m}$ .

267 Simulation data in Figure 7a show the temporal evolution of various agent subpopulations, includ-  
268 ing the total number of living agents, dead agents, G1, eS, S/G2/M, and G1-arrested agents. Each  
269 profile shows the mean number of agents obtained by simulating 10 identically initialised spheroids  
270 with  $r_o(0) = 245 \mu\text{m}$ , which matches the average spheroid diameter at  $t = 0$  days in the suite of *in*  
271 *vitro* experiments. The variability in these profiles is quantified by calculating the sample mean and  
272 sample standard deviation and shading the region corresponding to the sample mean plus or minus  
273 one sample standard deviation, and we see that, at this scale, the variability is barely noticeable.  
274 In contrast, results in Figure 7b show equivalent data from a suite of simulations where the initial  
275 density of agents in the spheroid is held constant, but the initial radius of the 10 simulated spheroids  
276 is deliberately varied to mimic the observed variability in our experiments. The initial radius in each  
277 simulation corresponds to one of 10 particular experimental measurements (Figure 7), with a sample  
278 mean of  $\bar{r}_o(0) = 245 \mu\text{m}$ . Comparing results in Figure 7a-b shows that the average population profiles  
279 are very similar, but the variability is strikingly different. This simple exercise shows that quantifying  
280 the variability in spheroid size at the beginning of the experiment is the key to understanding and  
281 predicting the variability in spheroid composition and size at the end of the experiment. We also see  
282 that 10 simulations is sufficient to observe the difference in variability between both test cases, where  
283 the spheroids start from identical initialisations or with induced variability. These simulation results  
284 are also consistent with our previous observations. For example, the *in vitro* spheroids in Figure 3

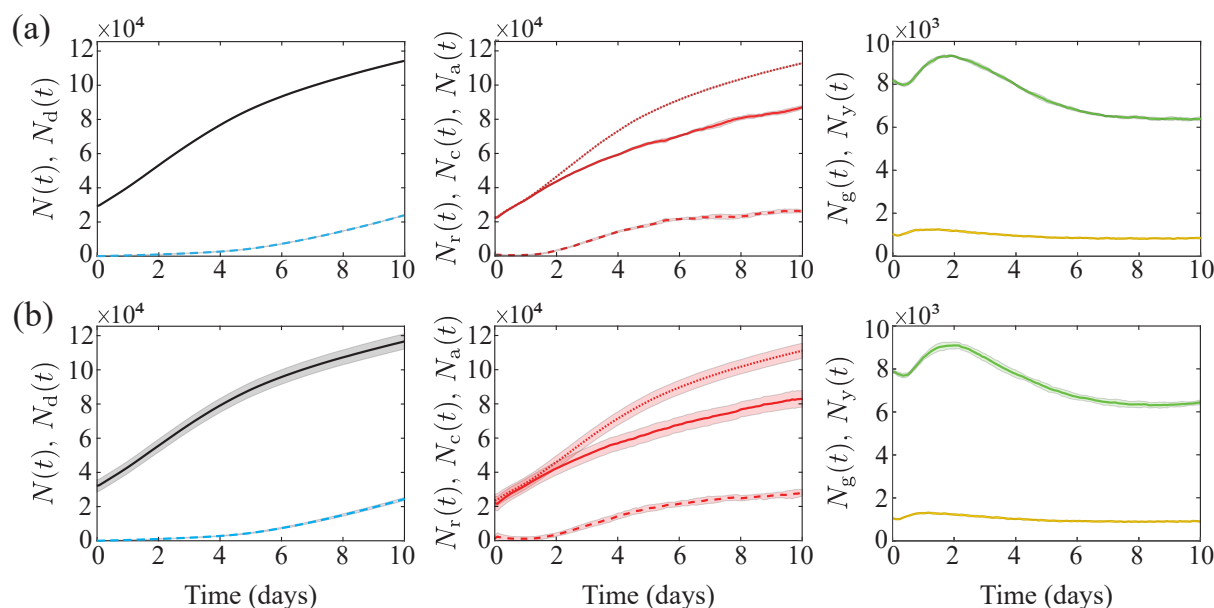

**Figure 7:** Modelling results for the population growth of different spheroid populations, averaged over 10 simulations with (a) identical initial conditions for each realisation and (b) introduced experimental variability in initial spheroid radius and population, with the agent density held constant and initial radius  $r_o(t) \in [232.75, 235.47, 238.97, 242.19, 244.89, 247.76, 247.93, 251.23, 251.48, 260.13] \mu\text{m}$ . In each row, left: living (black) and dead (cyan dashed) populations,  $N(t)$  and  $N_d(t)$ , respectively, centre: arrested red (dashed), cycling red (solid), and total red (dotted) populations,  $N_a(t)$ ,  $N_c(t)$ , and  $N_r(t)$ , respectively, and right: yellow and green populations,  $N_y(t)$  and  $N_g(t)$ , respectively. Shaded areas represent plus or minus one standard deviation. Initial subpopulations in each simulation in both (a) and (b) are variable, as initial cell cycle status is assigned randomly (Supplementary S7), and so the initial subpopulations in (b) also naturally vary with the overall initial population,  $N(0)$ .

285 have  $r_o(0) = 232 \mu\text{m}$  and we see that it takes until  $t = 6$  days for a clear necrotic core to form in  
 286 the equatorial cross section. In contrast, the spheroid in Figure 6 is larger with  $r_o(0) = 274 \mu\text{m}$  and  
 287 we see a clear necrotic core at  $t = 3$  days. This highlights the importance of taking great care with  
 288 measurements at the beginning of the experiment [36].

### 289 3.5. Quantitatively matching experimental and mathematical spheroids

290 Results in Figure 8 compare the temporal evolution of  $r_o(t)$ ,  $r_a(t)$ , and  $r_n(t)$ , from our suite of  
 291 experiments and simulations. The data in Figure 8 show the value in working with a stochastic  
 292 model since the experimental measurements are quite variable, with estimates of  $r_a(t)$  and  $r_n(t)$   
 293 more variable than estimates of  $r_o(t)$ . This difference in variability is because we measure  $r_o(t)$   
 294 automatically with an IncuCyte S3 every 6 hours. In contrast, measurements of  $r_a(t)$  and  $r_n(t)$   
 295 require manual harvesting, fixing, and imaging, and accordingly we report these measurements daily.

296 Similarly to Section 3.4, we compare experimental results of average data in simulations with  
 297 and without induced variability in the initial condition. The experiment-IBM comparison in Figure

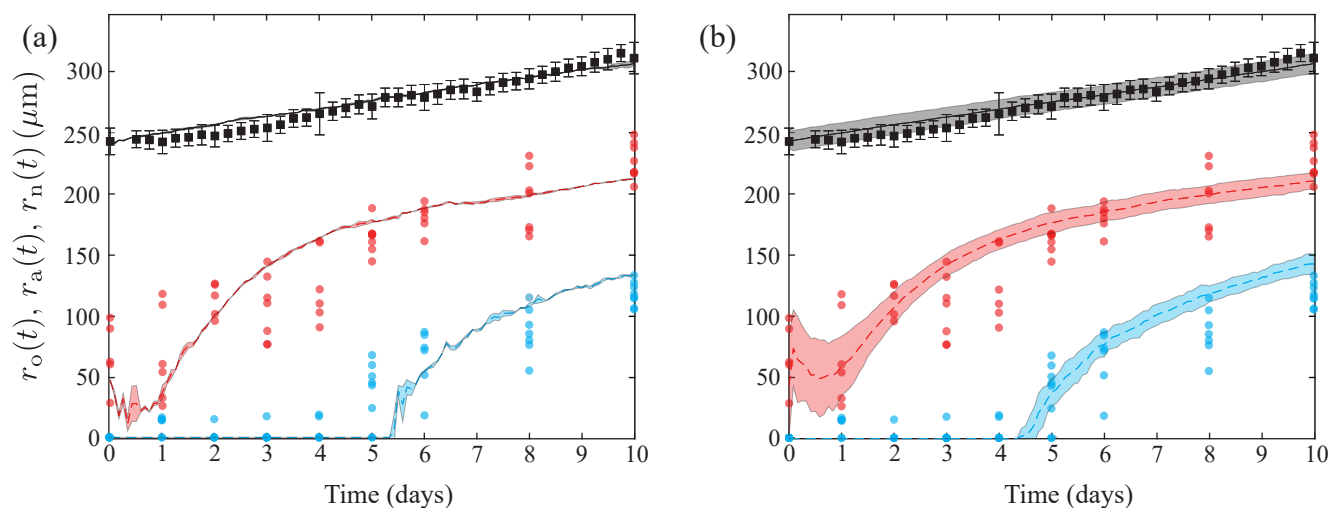

**Figure 8:** Comparison of computational estimates of  $r_o(t)$  (black),  $r_a(t)$  (red), and  $r_n(t)$  (cyan) with experimental data. The experimental data (dots) are compared with (a) simulations with each run starting with an identical parameter set and (b) simulations with variations of the initial spheroid radius and population, with each initial radius selected from experimentally measured radii at  $t = 0$  days and agent density kept constant. Computational results are the average of 10 simulations, and error regions represent plus or minus one standard deviation. The initial subpopulations vary in both (a) and (b), due to randomly assigning cell cycle status (Supplementary S7). In (b), we also naturally see higher variations in each subpopulation initially, due to explicitly including initial population variability, which in turn induces variability in  $r_a(0)$ .

298 8a corresponds to the case where we simulate 10 identically-prepared realisations of the IBM, where  
 299 each simulated spheroid has the same initial radius  $r_o(0) = 245 \mu\text{m}$ , and we see that the average  
 300 simulation results capture the average trends in the experimental measurements well, but the IBM  
 301 simulations do not capture observed variability in the evolution of  $r_a(t)$  or  $r_n(t)$ . In contrast, the  
 302 experiment-IBM comparison in Figure 8b, where we deliberately mimic the experimental variability  
 303 at  $t = 0$ , captures both the average experimental trends and variability in the experimental data quite  
 304 well. Again, the difference between Figure 8a-b suggests that incorporating the initial variability in  
 305 the experimental data is critical if we wish to capture the observed variability in the experiments.

306 Interestingly, our experimental data in Figure 8 suggest that we have an approximately linear  
 307 increase in  $r_o(t)$  over time, whereas the development of the internal structure is more complicated.  
 308 The initial arrested radius decreases for the first day before growing rapidly, and we do not see  
 309 the formation of a necrotic core until approximately  $t = 4$  days. While our IBM-experimental  
 310 comparison in Figure 8 suggests that the IBM can quantitatively capture experimental trends, we  
 311 have obtained this match with a careful choice of parameters without undertaking a more rigorous  
 312 parameter estimation exercise [41].

## 313 4. Conclusions and Future Work

314 In this work we develop a novel IBM that can simulate 4D tumour spheroid experiments with  
315 explicit cell cycle labels. IBM simulations reveal that we can successfully reproduce qualitative and  
316 quantitative patterns of spatial and temporal differences in cell cycle status that we observe in *in vitro*  
317 experiments. This heterogeneity is driven by spatial and temporal variations in nutrient availability,  
318 which we model using a reaction-diffusion equation coupled to the IBM.

319 An important advantage of the IBM is our ability to extract and describe measurements that  
320 are difficult to obtain *in vitro*. In particular, we show how to visualise both the growing populations  
321 within the spheroid together with the spatial patterns of nutrient concentration over time within  
322 the growing spheroid. Furthermore, the IBM makes it very simple to explore how various features  
323 contribute to the overall variability in spheroid development, and we find that relatively small varia-  
324 tions in the initial size of the spheroid lead to relatively pronounced differences in spheroid size and  
325 composition at later times [36]. We conclude our investigation by showing that we can quantitatively  
326 match the spatial and temporal development of a series of *in vitro* 4D spheroids using the WM793B  
327 human primary melanoma cell line with a careful choice of parameters. We anticipate that tumour  
328 spheroids formed with different cell lines will be able to be simulated with our IBM, but will require  
329 different parameter values.

330 Overall, our modelling philosophy is always to work with the simplest possible mechanisms re-  
331 quired to capture our experimental observations. Naturally, this means that there are many ways  
332 that the IBM can be extended. For example, here we make the simple assumption that spheroid  
333 growth is regulated by a single diffusible nutrient, which seems appropriate for our data. If, however,  
334 experiments show that it is important to consider multiple nutrients in unison, our IBM framework  
335 can be extended to deal with this. Similarly, we have focused on spheroid growth commencing with  
336 a spherically symmetric initial condition which is consistent with our experiments. This assumption  
337 can be relaxed in the present model simply by specifying a different arrangement of agents at  $t = 0$ .  
338 Another point that could be revisited is that we implement the simplest possible cell migration  
339 mechanism where the direction of motion is random. While this assumption appears reasonable for  
340 our data, it is possible to bias the migration in response to either the nutrient concentration, the

341 gradient of the nutrient concentration, or the density of agents. Each of these potential extensions  
342 could be incorporated into our IBM framework and increase the biological fidelity of the model.  
343 However, here we caution against this approach since these mechanisms also increase the number of  
344 parameters required for simulation. To minimise issues with parameter identifiability, we prefer to  
345 work with a minimal model [41]. If, however, future experimental measurements indicate that our  
346 minimal assumptions need to be revised, our IBM framework is sufficiently flexible to incorporate  
347 such extensions, if warranted. Another option for future refinement is to conduct a more thorough  
348 parameter estimation exercise. Here we carefully chose parameters that appear to match our data,  
349 but future analysis could include a more rigorous assessment of parameter estimation, and we leave  
350 this for future consideration.

### 351 **Acknowledgements**

352 MJS, NKH, and MJP are supported by the Australian Research Council (DP200100177). We ap-  
353 preciate computational resources of the QUT High Performance Computing support group.



354 **References**

- 355 [1] Nunes AS, Barris AS, Costa EC, Moreira AF, Correia IJ, 2018. 3D tumor spheroids as in vitro  
356 models to mimic in vivo human solid tumors resistance to therapeutic drugs. *Biotechnology and*  
357 *Bioengineering*, **116**:206–226. doi: [10.1002/bit.26845](https://doi.org/10.1002/bit.26845).
- 358 [2] Lazzari G, Couvreur P, Mura S, 2017. Multicellular tumor spheroids: a relevant 3D model for the  
359 *in vitro* preclinical investigation of polymer nanomedicines. *Polymer Chemistry*, **8**:4947–4969.  
360 doi: [10.1039/C7PY00559H](https://doi.org/10.1039/C7PY00559H).
- 361 [3] Spoerri L, Beaumont KA, Anfosso A, Haass NK, 2017. Real-time cell cycle imaging in a 3D cell  
362 culture model of melanoma. *Methods in Molecular Biology*, **1612**:401–416. doi: [10.1007/978-1-4939-7021-6\\_29](https://doi.org/10.1007/978-1-4939-7021-6_29).
- 364 [4] Haass NK, Beaumont KA, Hill DS, Anfosso A, Mrass P, Munoz MA, Kinjyo I, Weninger W, 2014.  
365 Real-time cell cycle imaging during melanoma growth, invasion, and drug response. *Pigment*  
366 *Cell & Melanoma Research*, **27**:764–776. doi: [10.1111/pcmr.12274](https://doi.org/10.1111/pcmr.12274).
- 367 [5] Mehta G, Hsiao AY, Ingram M, Luker GD, Takayama S, 2012. Opportunities and challenges  
368 for use of tumor spheroids as models to test drug delivery and efficacy. *Journal of Controlled*  
369 *Release*, **164**:192–204. doi: [10.1016/j.jconrel.2012.04.045](https://doi.org/10.1016/j.jconrel.2012.04.045).
- 370 [6] Beaumont KA, Mohana-Kumaran N, Haass NK, 2014. Modelling melanoma *in vitro* and *in*  
371 *vivo*. *Healthcare*, **2**:27–46. doi: [10.3390/healthcare2010027](https://doi.org/10.3390/healthcare2010027).
- 372 [7] Sakaue-Sawano A, Kurokawa H, Morimura T, Hanyu A, Hama H, Osawa H, Kashiwagi S, Fukami  
373 K, Miyata T, Miyoshi H, et al., 2008. Visualizing spatiotemporal dynamics of multicellular cell-  
374 cycle progression. *Cell*, **132**:487–498. doi: [10.1016/j.cell.2007.12.033](https://doi.org/10.1016/j.cell.2007.12.033).
- 375 [8] Vittadello ST, McCue SW, Gunasingh G, Haass NK, Simpson MJ, 2019. Mathematical models  
376 incorporating a multi-stage cell cycle replicate normally-hidden inherent synchronoization in cell  
377 proliferation. *Journal of the Royal Society Interface*, **16**:20190382. doi: [10.1098/rsif.2019.0382](https://doi.org/10.1098/rsif.2019.0382).

- 378 [9] Jin W, Spoerri L, Haass NK, Simpson MJ, 2021. Mathematical model of tumour spheroid  
379 experiments with real-time cell cycle imaging. *Bulletin of Mathematical Biology*, **83**:1–23. doi:  
380 [10.1007/s11538-021-00878-4](https://doi.org/10.1007/s11538-021-00878-4).
- 381 [10] Greenspan HP, 1972. Models for the growth of a solid tumor by diffusion. *Studies in Applied*  
382 *Mathematics*, **51**:317–340. doi: [10.1002/sapm1972514317](https://doi.org/10.1002/sapm1972514317).
- 383 [11] McElwain DLS, Ponzio PJ, 1977. A model for the growth of a solid tumor with non-uniform  
384 oxygen consumption. *Mathematical Biosciences*, **35**:267–279. doi: [10.1016/0025-5564\(77\)90028-](https://doi.org/10.1016/0025-5564(77)90028-1)  
385 [1](https://doi.org/10.1016/0025-5564(77)90028-1).
- 386 [12] Ward JP, King JR, 1997. Mathematical modelling of avascular-tumour growth. *Mathematical*  
387 *Medicine and Biology*, **14**:39–69. doi: [10.1093/imamb/14.1.39](https://doi.org/10.1093/imamb/14.1.39).
- 388 [13] Landman KA, Please CP, 2001. Tumour dynamics and necrosis: surface tension and stability.  
389 *Mathematical Medicine and Biology*, **18**:131–158. doi: [10.1093/imamb/18.2.131](https://doi.org/10.1093/imamb/18.2.131).
- 390 [14] Byrne HM, Chaplain MAJ, 1995. Growth of nonnecrotic tumors in the presence and absence of  
391 inhibitors. *Mathematical Biosciences*, **130**:151–181. doi: [10.1016/0025-5564\(94\)00117-3](https://doi.org/10.1016/0025-5564(94)00117-3).
- 392 [15] Byrne HM, King JR, McElwain DLS, Preziosi L, 2003. A two-phase model of solid tumour  
393 growth. *Applied Mathematics Letters*, **16**:567–573. doi: [10.1016/S0893-9659\(03\)00038-7](https://doi.org/10.1016/S0893-9659(03)00038-7).
- 394 [16] Leedale J, Herrmann A, Bagnall J, Fercher A, Papkovsky D, Sée V, Bearon RN, 2014. Modeling  
395 the dynamics of hypoxia inducible factor-1 $\alpha$ (HIF-1 $\alpha$ ) within single cells and 3D cell culture  
396 systems. *Mathematical Biosciences*, **258**:33–43. doi: [10.1016/j.mbs.2014.09.007](https://doi.org/10.1016/j.mbs.2014.09.007).
- 397 [17] Grimes DR, Kelly C, Bloch K, Partridge M, 2014. A method for estimating the oxygen consump-  
398 tion rate in multicellular tumour spheroids. *Journal of the Royal Society Interface*, **11**:20131124.  
399 doi: [10.1098/rsif.2013.1124](https://doi.org/10.1098/rsif.2013.1124).
- 400 [18] Browning AP, Sharp JA, Murphy RJ, Gunasingh G, Lawson B, Burrage K, Haass NK,  
401 Simpson MJ, 2021. Quantitative analysis of tumour spheroid structure. *bioRxiv*. doi:  
402 [10.1101/2021.08.05.455334](https://doi.org/10.1101/2021.08.05.455334). To appear, eLife.

- 403 [19] Codling EA, Plank MJ, Benhamou S, 2008. Random walk models in biology. *Journal of the*  
404 *Royal Society Interface*, **5**:813–834. doi: [10.1098/rsif.2008.0014](https://doi.org/10.1098/rsif.2008.0014).
- 405 [20] Mallet DG, De Pillis LG, 2006. A cellular automata model of tumor-immune system interactions.  
406 *Journal of Theoretical Biology*, **239**:334–350. doi: [10.1016/j.jtbi.2005.08.002](https://doi.org/10.1016/j.jtbi.2005.08.002).
- 407 [21] Browning AP, McCue SW, Binny RN, Plank MJ, Shah ET, Simpson MJ, 2018. Inferring  
408 parameters for a lattice-free model of cell migration and proliferation using experimental data.  
409 *Journal of Theoretical Biology*, **437**:251–260. doi: [10.1016/j.jtbi.2017.10.032](https://doi.org/10.1016/j.jtbi.2017.10.032).
- 410 [22] Browning AP, Jin W, Plank MJ, Simpson MJ, 2020. Identifying density-dependent interac-  
411 tions in collective cell behaviour. *Journal of the Royal Society Interface*, **17**:20200143. doi:  
412 [10.1098/rsif.2020.0143](https://doi.org/10.1098/rsif.2020.0143).
- 413 [23] Carr MJ, Simpson MJ, Drovandi C, 2021. Estimating parameters of a stochastic cell invasion  
414 model with fluorescent cell cycle labelling using approximate Bayesian computation. *Journal of*  
415 *the Royal Society Interface*, **18**:20210362. doi: [10.1098/rsif.2021.0362](https://doi.org/10.1098/rsif.2021.0362).
- 416 [24] Mao X, McManaway S, Jaiswal JK, Patel PB, Wilson WR, Hicks KO, Bogle G, 2018. An agent-  
417 based model for drug-radiation interactions in the tumour microenvironment: hypoxia-activated  
418 prodrug SN30000 in multicellular tumour spheroids. *PLoS Computational Biology*, **14**:e1006469.  
419 doi: [10.1371/journal.pcbi.1006469](https://doi.org/10.1371/journal.pcbi.1006469).
- 420 [25] Bull JA, Mech F, Quaiser T, Waters SL, Byrne HM, 2020. Mathematical modelling reveals  
421 cellular dynamics within tumour spheroids. *PLoS Computatinal Biology*, **16**:e1007961. doi:  
422 [10.1371/journal.pcbi.1007961](https://doi.org/10.1371/journal.pcbi.1007961).
- 423 [26] Hoek KS, Schlegel NC, Brafford P, Sucker A, Ugurel S, Kumar R, Weber BL, Nathanson KL,  
424 Phillips DJ, Herlyn M, et al., 2006. Metastatic potential of melanomas defined by specific  
425 gene expression profiles with no BRAF signature. *Pigment Cell Research*, **19**:290–302. doi:  
426 [10.1111/j.1600-0749.2006.00322.x](https://doi.org/10.1111/j.1600-0749.2006.00322.x).
- 427 [27] Smalley KSM, Contractor R, Haass NK, Kulp AN, Atilla-Gokcumen GE, Williams DS, Bregman  
428 H, Flaherty KT, Soengas MS, Meggers E, et al., 2007. An organometallic protein kinase in-

- 429 inhibitor pharmacologically activates p53 and induces apoptosis in human melanoma cells. *Cancer*  
430 *Research*, **67**:209–217. doi: [10.1158/0008-5472.CAN-06-1538](https://doi.org/10.1158/0008-5472.CAN-06-1538).
- 431 [28] Smalley KSM, Contractor R, Haass NK, Nathanson KL, Medina CA, T. FK, Herlyn M, 2007.  
432 Ki67 expression levels are a better marker of reduced melanoma growth following MEK in-  
433 hibitor treatment than phospho-ERK levels. *British Journal of Cancer*, **96**:445–449. doi:  
434 [10.1038/sj.bjc.6603596](https://doi.org/10.1038/sj.bjc.6603596).
- 435 [29] Spoerri L, Gunasingh G, Haass NK, 2021. Fluorescence-based quantitative and spatial analysis  
436 of tumour spheroids: a proposed tool to predict patient-specific therapy response. *Frontiers in*  
437 *Digital Health*, **3**:1–19. doi: [10.3389/fdgth.2021.668390](https://doi.org/10.3389/fdgth.2021.668390).
- 438 [30] Cold Spring Harbor Laboratory Press, 2018. Antibody dilution buffer (Abdil) protocol. doi:  
439 [10.1101/pdb.rec103978](https://doi.org/10.1101/pdb.rec103978) (Accessed: November 2021).
- 440 [31] Browning AP, Murphy RJ, 2021. Image processing algorithm to identify structure of tumour  
441 spheroids with cell cycle labelling. *Zenodo*. doi: [10.5281/zenodo.5121093](https://doi.org/10.5281/zenodo.5121093).
- 442 [32] Gillespie DT, 1977. Exact stochastic simulation of coupled chemical reactions. *The Journal of*  
443 *Physical Chemistry*, **81**:2340–2361. doi: [10.1021/j100540a008](https://doi.org/10.1021/j100540a008).
- 444 [33] Weisstein EW, 2021. Sphere point picking. mathworld – A Wolfram web resource.  
445 <https://mathworld.wolfram.com/SpherePointPicking.html>. (Accessed: November 2021).
- 446 [34] Simpson MJ, Landman KA, Hughes BD, 2010. Cell invasion with proliferation mechanisms  
447 motivated by time-lapse data. *Physica A: Statistical Mechanics and its Applications*, **389**:3779–  
448 3790. doi: [10.1016/j.physa.2010.05.020](https://doi.org/10.1016/j.physa.2010.05.020).
- 449 [35] Treloar KK, Simpson MJ, 2013. Sensitivity of edge detection methods for quantifying cell  
450 migration assays. *PLoS One*, **8**:e67389–e67389. doi: [10.1371/journal.pone.0067389](https://doi.org/10.1371/journal.pone.0067389).
- 451 [36] Murphy RJ, Browning AP, Gunasingh G, Haass NK, Simpson MJ, 2021. Designing and inter-  
452 preting 4D tumour spheroid experiments. *bioRxiv*. doi: [10.1101/2021.08.18.456910](https://doi.org/10.1101/2021.08.18.456910).

- 453 [37] Spoerri L, Tonnessen-Murray CA, Gunasingh G, Hill DS, Beaumont KA, Jurek RJ, Chauhan J,  
454 Vanwalleghem GC, Fane ME, Daignault-Mill SM, et al., 2021. Phenotypic melanoma heterogene-  
455 ity is regulated through cell-matrix interaction-dependent changes in tumor microarchitecture.  
456 *bioRxiv preprint*. doi: [10.1101/2020.06.09.141747](https://doi.org/10.1101/2020.06.09.141747).
- 457 [38] Miniaev MV, Belyakova MB, Kostiuk NV, Leshchenko DV, Fedotova TA, 2013. Non-obvious  
458 problems in Clark electrode application at elevated temperature and ways of their elimination.  
459 *Journal of Analytical Methods in Chemistry*, **2013**:249752. doi: [10.1155/2013/249752](https://doi.org/10.1155/2013/249752).
- 460 [39] Langan LM, Dodd NJF, Owen SF, Purcell WM, Jackson SK, Jha AN, 2016. Direct mea-  
461 surements of oxygen gradients in spheroid culture system using electrion parametric resonance  
462 oximetry. *PLoS One*, **11**:e0149492. doi: [10.1371/journal.pone.0149492](https://doi.org/10.1371/journal.pone.0149492).
- 463 [40] Varia MA, Calkins-Adams DP, Rinker LH, Kennedy AS, Novotny DB, Fowler WC, Jr, Raleigh  
464 JA, 1998. Pimonidazole: a novel hypoxia marker for complementary study of tumor hy-  
465 poxia and cell proliferation in cervical carcinoma. *Gynecologic Oncology*, **71**:270–277. doi:  
466 [10.1006/gyno.1998.5163](https://doi.org/10.1006/gyno.1998.5163).
- 467 [41] Simpson MJ, Baker RE, Vittadello ST, Maclaren OJ, 2020. Practical parameter identifiability  
468 for spatio-temporal models of cell invasion. *Journal of the Royal Society Interface*, **17**:20200055.  
469 doi: [10.1098/rsif.2020.0055](https://doi.org/10.1098/rsif.2020.0055).
